# Supplementary material for: Concentrations of Carotenoids and Tocopherols in Breast Milk from Urban Chinese Mothers and Their Associations with Maternal Characteristics: A Cross-Sectional Study
Source: MDPI journal article supplement (doi:10.3390/nu9111229), 2017-11-09
Supplement: s1 [file s1]

**Table S1.** Comparisons of carotenoids and tocopherols concentration according to characteristics of lactating women and their offspring (μg/100mL).

|                                     | β-carotene <sup>1</sup> | β-cryptoxanthin <sup>1</sup> | Lutein <sup>1</sup>        | Lycopene <sup>1</sup> | Zeaxanthin <sup>1</sup>    | α-tocopherol <sup>1</sup> | γ-tocopherol <sup>1</sup> |
|-------------------------------------|-------------------------|------------------------------|----------------------------|-----------------------|----------------------------|---------------------------|---------------------------|
| Age, years                          |                         |                              |                            |                       |                            |                           |                           |
| < 25                                | 2.4 (1.7-3.9)           | 3.1 (1.7-5.7) <sup>a</sup>   | 4.2 (2.2-7.3)              | 1.8 (1.3-3.2)         | 1.1 (0.7-1.8)              | 284 (175-452)             | 77 (52-131)               |
| 25-30                               | 2.2 (1.4-3.9)           | 2.1 (1.1-4.0) <sup>a</sup>   | 4.1 (2.0-7.0)              | 1.8 (1.3-2.8)         | 1.0 (0.6-1.4)              | 261 (139-403)             | 67 (42-107)               |
| > 30                                | 2.5 (1.6-5.0)           | 2.5 (1.1-4.7)                | 3.9 (1.8-8.7)              | 1.8 (1.3-2.9)         | 1.1 (0.7-1.6)              | 281 (179-473)             | 73 (41-120)               |
| Offspring gender                    |                         |                              |                            |                       |                            |                           |                           |
| Male                                | 2.4 (1.5-4.2)           | 2.5 (1.4-4.8)                | 4.6 (2.2-8.0)              | 1.8 (1.3-3.2)         | 1.1 (0.6-1.7)              | 274 (153-452)             | 73 (44-121)               |
| Female                              | 2.2 (1.5-4.2)           | 2.1 (1.1-4.6)                | 3.6 (1.7-6.8)              | 1.8 (1.3-2.8)         | 1.0 (0.6-1.5)              | 275 (171-442)             | 68 (44-107)               |
| Education                           |                         |                              |                            |                       |                            |                           |                           |
| Middle school or blow               | 2.3 (1.5-4.1)           | 2.7 (1.5-5.2) <sup>a</sup>   | 4.1 (2.1-7.4)              | 1.7 (1.3-2.4)         | 1.1 (0.7-1.8) <sup>a</sup> | 283 (165-448)             | 84 (45-143)               |
| High school                         | 2.2 (1.5-4.1)           | 2.4 (1.4-4.8)                | 4.5 (2.0-7.1)              | 1.8 (1.1-3.1)         | 1.1 (0.6-1.5)              | 263 (161-419)             | 67 (43-103)               |
| College or above                    | 2.4 (1.5-4.9)           | 2.1 (1.0-4.5) <sup>a</sup>   | 3.9 (2.0-7.3)              | 2.0 (1.3-3.2)         | 1.0 (0.6-1.4) <sup>a</sup> | 273 (156-468)             | 70 (44-107)               |
| Family's per capita income, Yuan/mo |                         |                              |                            |                       |                            |                           |                           |
| < 2000                              | 2.2 (1.4-3.9)           | 2.5 (1.4-5.1)                | 3.8 (2.1-7.4)              | 1.7 (1.3-2.8)         | 1.0 (0.6-1.5)              | 268 (164-451)             | 76 (46-122)               |
| 2000-4000                           | 2.2 (1.4-4.1)           | 2.1 (1.1-4.1)                | 3.8 (1.8-6.2)              | 1.7 (1.3-2.8)         | 1.0 (0.6-1.5)              | 272 (142-426)             | 73 (43-112)               |
| > 4000                              | 2.5 (1.7-4.8)           | 2.5 (1.4-5.8)                | 5.3 (2.1-8.7)              | 2.2 (1.4-3.4)         | 1.1 (0.6-2.0)              | 293 (174-496)             | 67 (43-109)               |
| Unknown                             | 2.2 (1.7-5.9)           | 1.7 (1.2-5.3)                | 5.7 (2.3-8.8)              | 2.0 (1.3-3.5)         | 0.8 (0.6-1.9)              | 283 (178-432)             | 58 (28-130)               |
| Delivery mode                       |                         |                              |                            |                       |                            |                           |                           |
| Vaginal delivery                    | 2.4 (1.5-4.1)           | 2.7 (1.4-4.8)                | 4.6 (2.2-7.5) <sup>a</sup> | 1.8 (1.3-2.7)         | 1.1 (0.7-1.7) <sup>a</sup> | 274 (164-453)             | 71 (44-113)               |
| Cesarean delivery                   | 2.2 (1.5-4.3)           | 2.1 (1.1-4.7)                | 3.5 (1.7-6.9) <sup>a</sup> | 1.8 (1.3-3.5)         | 1.0 (0.6-1.4) <sup>a</sup> | 274 (161-427)             | 73 (44-115)               |

|                            |                             |               |                            |               |                              |               |             |
|----------------------------|-----------------------------|---------------|----------------------------|---------------|------------------------------|---------------|-------------|
| Present BMI                |                             |               |                            |               |                              |               |             |
| Underweight                | 2.6 (1.6-3.8)               | 2.8 (1.5-4.0) | 7.4 (2.9-9.0) <sup>a</sup> | 1.5 (1.1-2.1) | 1.5 (0.8-2.6) <sup>abc</sup> | 285 (214-463) | 80 (47-122) |
| Normal                     | 2.4 (1.5-4.5) <sup>a</sup>  | 2.5 (1.4-5.3) | 4.3 (2.1-7.4)              | 1.8 (1.3-2.9) | 1.1 (0.6-1.5) <sup>a</sup>   | 268 (161-438) | 68 (41-112) |
| Overweight                 | 2.0 (1.4-3.9) <sup>ab</sup> | 1.8 (1.1-3.9) | 3.4 (1.5-6.4) <sup>a</sup> | 2.0 (1.3-3.2) | 1.0 (0.6-1.5) <sup>b</sup>   | 274 (158-446) | 75 (51-121) |
| Obesity                    | 1.7 (1.1-2.2) <sup>b</sup>  | 1.4 (0.8-5.6) | 3.4 (1.3-6.9)              | 2.1 (1.3-4.6) | 0.7 (0.4-1.4) <sup>c</sup>   | 288 (141-603) | 93 (62-180) |
| Gestational weight gain    |                             |               |                            |               |                              |               |             |
| Inadequate                 | 2.4 (1.5-5.3)               | 2.8 (1.5-4.7) | 5.1 (2.3-8.6)              | 1.7 (1.3-2.7) | 1.3 (0.7-1.8)                | 279 (151-449) | 67 (41-106) |
| Adequate                   | 2.4 (1.5-4.5)               | 2.5 (1.3-6.0) | 4.5 (2.1-8.1)              | 2.0 (1.3-3.3) | 1.1 (0.6-1.6)                | 282 (171-455) | 69 (42-118) |
| Excessive                  | 2.2 (1.5-4.0)               | 2.1 (1.0-4.2) | 3.5 (1.8-6.4)              | 1.8 (1.3-2.9) | 1.0 (0.6-1.4)                | 265 (158-426) | 76 (48-112) |
| Dietary supplements intake |                             |               |                            |               |                              |               |             |
| Yes                        | 2.2 (1.7-3.6)               | 2.4 (1.1-3.8) | 3.9 (2.1-6.6)              | 1.7 (1.3-2.5) | 1.1 (0.6-1.4)                | 274 (146-381) | 68 (35-107) |
| No                         | 2.3 (1.5-4.4)               | 2.4 (1.3-4.8) | 4.2 (2.1-7.5)              | 1.8 (1.3-3.2) | 1.0 (0.6-1.7)                | 273 (162-457) | 72 (45-116) |

---

Data are presented as the medians (interquartile ranges). <sup>1</sup> All of data were performed ln transformations and then compared by analysis covariance adjusted with cities (Beijing, Suzhou, and Guangzhou cities) and periods of lactating (0-4 d, 5-11 d, 12-30 d, 31-60 d, 61-120 d, and 121-240 d *postpartum*). Median values in the same column with same superscript letters (a, b, c) were significantly different,  $p < 0.05$ .
